# Supplementary material for: Proteomic Analysis Reveals the Deregulation of Inflammation-Related Proteins in Acupuncture-Treated Rats with Asthma Onset
Source: Hindawi journal article supplement (doi:10.1155/2012/850512), 2012-01-01
Supplement: f1 [file 850512.f1.pdf]

**Supplemental Figure 1.** Rats on the suspended shelf. For the convenient manipulation of the acupuncture points on the back, rat was placed on the suspended shelf (50 × 45 mm, about 50 cm high from the ground, shown as below), which could easily make it calm and stand still without anesthesia.

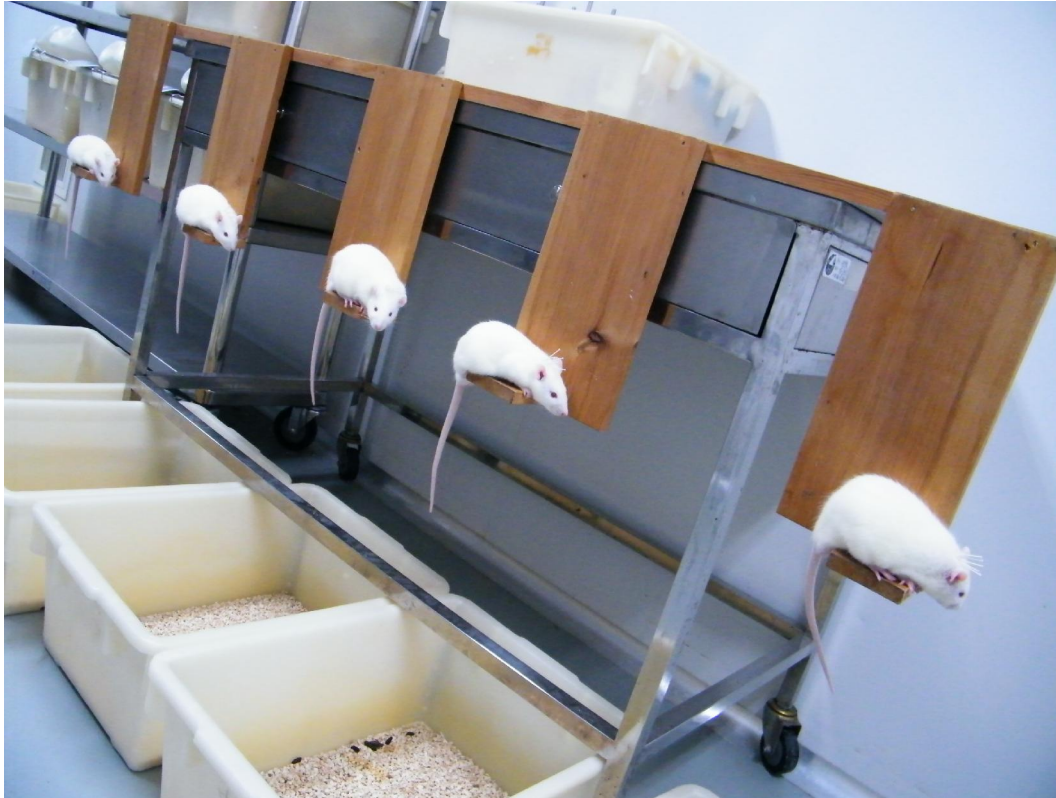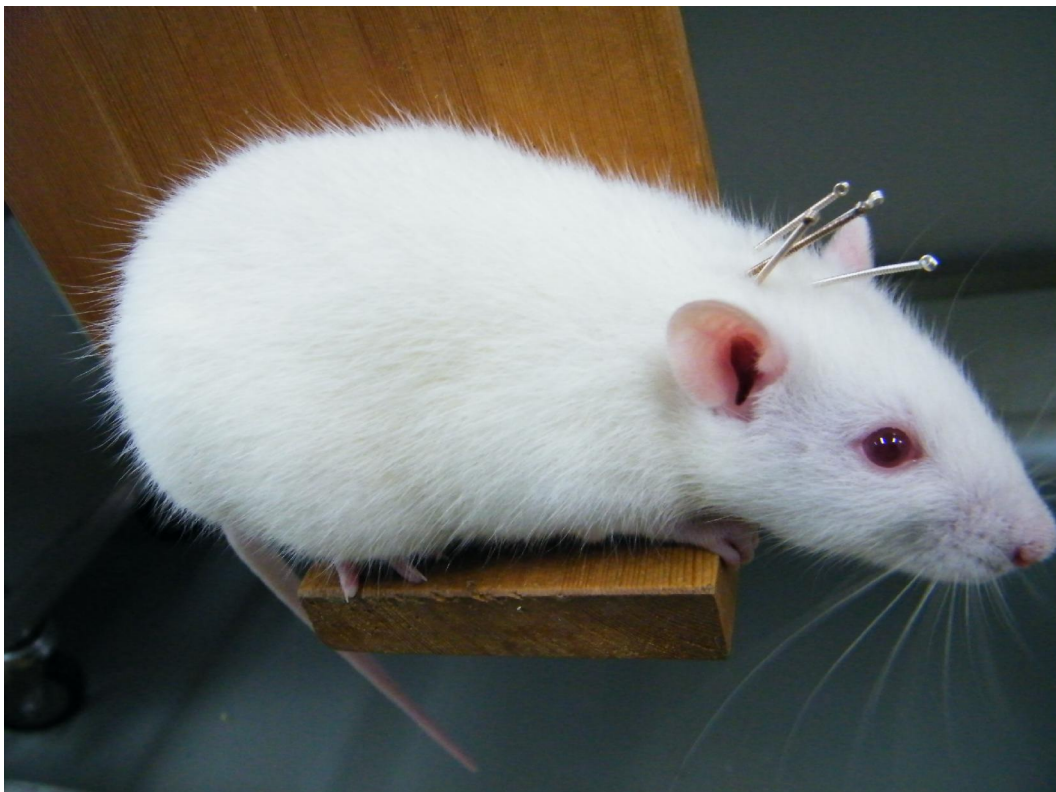

**Supplemental Table 1. The comparisons of pulmonary dynamic compliance (Cdyn, ml/ kpa) and respiratory rate (RR, breaths/min) within 10min after challenge**

|             | Groups | Min 1                            | Min 2                            | Min 3                            | Min 4                            | Min 5                            | Min 6                            | Min 7                           | Min 8                            | Min 9                            | Min 10                           |
|-------------|--------|----------------------------------|----------------------------------|----------------------------------|----------------------------------|----------------------------------|----------------------------------|---------------------------------|----------------------------------|----------------------------------|----------------------------------|
| <b>Cdyn</b> | NC     | 1.066±2.<br>796                  | 0.463±2.<br>609                  | -0.373±2<br>.496                 | -2.128±2<br>.625                 | -1.53±2.8<br>36                  | -2.25±3.1<br>79                  | -2.208±3.<br>117                | -4.015±2.<br>542                 | -5.605±2.<br>933                 | -3.679±3.<br>747                 |
|             | AS     | -3.629±3.<br>493                 | -20.434±<br>5.057 <sup>###</sup> | -23.641±<br>5.242 <sup>###</sup> | -17.95±6<br>.017 <sup>#</sup>    | -12.561±<br>5.277 <sup>#</sup>   | -3.274±5.<br>035                 | 3.584±5.<br>266                 | 6.292±5.<br>018 <sup>#</sup>     | 5.992±4.<br>642 <sup>#</sup>     | 5.698±4.<br>240                  |
|             | AA     | -0.319±3.<br>512                 | 3.198±5.<br>929 <sup>**</sup>    | 7.435±7.<br>046 <sup>**</sup>    | 3.751±6.<br>623 <sup>**</sup>    | 4.322±5.<br>367 <sup>**</sup>    | 3.725±5.<br>11                   | 8.03±5.6<br>38                  | 7.889±4.<br>385                  | 6.86±3.7<br>44                   | 5.707±3.<br>458                  |
|             | NA     | 1.019±2.<br>736                  | 0.417±1.<br>238                  | -1.095±1<br>.338                 | -0.14±1.<br>154                  | -0.959±1.<br>12                  | -1.923±1.<br>562                 | -0.883±1.<br>109                | -0.552±1.<br>232                 | -1.503±1.<br>303                 | -2.071±1.<br>656                 |
| <b>RR</b>   | NC     | 7.04±2.4<br>96                   | 2.084±1.<br>233                  | 1.5±1.30<br>8                    | 1.871±1.<br>301                  | 1.974±1.<br>419                  | 3.238±1.<br>439                  | 3.934±1.<br>365                 | 3.898±1.<br>434                  | 4.352±1.<br>734                  | 5.465±2.<br>433                  |
|             | AS     | -28.948±<br>5.912 <sup>###</sup> | -53.031±<br>8.193 <sup>###</sup> | -46.9±6.<br>911 <sup>###</sup>   | -39.065±<br>5.768 <sup>###</sup> | -28.048±<br>2.843 <sup>###</sup> | -17.874±<br>3.708 <sup>###</sup> | -13.32±5.<br>078 <sup>###</sup> | -13.033±<br>4.697 <sup>###</sup> | -13.178±<br>4.731 <sup>###</sup> | -12.583±<br>5.065 <sup>###</sup> |
|             | AA     | -29.822±<br>8.505                | -48.332±<br>11.297               | -36.24±9<br>.328                 | -25.474±<br>8.025                | -21.728±<br>7.631                | -18.959±<br>6.143                | -15.501±<br>4.685               | -15.508±<br>4.221                | -14.934±<br>4.449                | -17.906±<br>5.674                |
|             | NA     | 4.055±1.<br>366                  | 0.506±1.<br>162                  | 1.465±0.<br>927                  | 2.251±1.<br>182                  | 2.536±1.<br>143                  | 3.521±1.<br>387                  | 3.094±1.<br>203                 | 3.287±1.<br>336                  | 4.173±1.<br>84                   | 6.662±2.<br>225                  |

Data are shown as means ± SEM. NC: normal control rats (n = 15); AS: asthma model (n = 14); AA: asthma model treated with acupuncture (n = 12); NA: normal rats treated with acupuncture. The values of Cdyn and RR in the tables are expressed as differential values subtracted from the corresponding baseline values (Figure 1). # p < 0.05, ## p < 0.01 when comparing the AS group with the NC group and \* p < 0.05, \*\* p < 0.01 when comparing the AA group with the AS group, , one-way ANOVA followed by LSD post hoc comparisons.

**Supplemental Table 2. List of PANTHER biologic process classification**

| Biological process              | Number of process hits | Identified proteins                                                                                                                                                                                                                                                                      |
|---------------------------------|------------------------|------------------------------------------------------------------------------------------------------------------------------------------------------------------------------------------------------------------------------------------------------------------------------------------|
| signal transduction             | 7                      | RhoGDI2, S100A8, S100A11, RAGE, Uteroglobin, Annexin A5, Ras suppressor protein 1                                                                                                                                                                                                        |
| oxidation reduction             | 2                      | Peroxiredoxin-6, Protein disulfide-isomerase A6                                                                                                                                                                                                                                          |
| cellular process                | 10                     | RhoGDI2, S100A8, S100A11, RAGE, Uteroglobin, Annexin A5, Tubulin alpha-1A chain, Actin, cytoplasmic 1, Actin, alpha skeletal muscle, Cofilin-1                                                                                                                                           |
| transport                       | 7                      | Serum albumin, ATP synthase subunit alpha, mitochondrial, Sodium/potassium-transporting ATPase subunit alpha-1, Tubulin alpha-1A chain, Annexin A5, Actin, cytoplasmic 1                                                                                                                 |
| cellular component organization | 4                      | Tubulin alpha-1A chain, Actin, cytoplasmic 1, Actin, alpha skeletal muscle, Cofilin-1                                                                                                                                                                                                    |
| response to stimulus            | 3                      | S100A8, S100A11, Heat shock-related 70                                                                                                                                                                                                                                                   |
| developmental process           | 6                      | RAGE, N(G),N(G)-dimethylarginine dimethylaminohydrolase 2, Tubulin alpha-1A chain, Actin, cytoplasmic 1, Actin, alpha skeletal muscle, Cofilin-1                                                                                                                                         |
| metabolic process               | 16                     | Peroxiredoxin-6; Protein disulfide-isomerase A6; Atic; Psmc6; Glyceraldehyde-3-phosphate dehydrogenase; Anionic trypsin-1; Gamma-enolase; Phosphoglycerate mutase 1; Carbonic anhydrase 2; synthase subunit alpha, mitochondrial; Sodium/potassium-trtransporting ATPase subunit alpha-1 |
| cell cycle                      | 5                      | S100A8, S100A11, Tubulin alpha-1A chain, Actin, cytoplasmic 1, Actin, alpha skeletal muscle                                                                                                                                                                                              |
| immune system process           | 6                      | Peroxiredoxin-6, S100A8, S100A11, uteroglobin, RAGE, Heat shock-related 70 kDa protein 2                                                                                                                                                                                                 |
| other                           | 4                      | RAGE, Sodium/potassium-transporting ATPase subunit alpha-1, ATP synthase subunit alpha, mitochondrial, Creatine kinase B-type                                                                                                                                                            |

The number of process hits is greater than the number of proteins since many proteins are classified as having multiple functions. "Other" category contains biological processes with only 1 hit: homeostatic process, cell adhesion, system process, generation of precursor metabolites and energy.

**Supplemental Table 3 (a). Mass spectrometric data of differentially expressed protein spot 24**

| Reference IPI: IPI00209188.5 SWISS-PROT: Q63495 TREMBL: Q6MG86 ENSEMBL: ENSRNOP00000000508 REFSEQ: NP_445788 |                                |            |           |                |              |          |         |
|--------------------------------------------------------------------------------------------------------------|--------------------------------|------------|-----------|----------------|--------------|----------|---------|
| Advanced glycosylation end product-specific receptor precursor                                               |                                |            | PepCount  | UniquePepCount | CoverPercent | MW       | PI      |
|                                                                                                              |                                |            | 25        | 6              | 23.38%       | 42663.67 | 5.83    |
| File, Scan(s)                                                                                                | Sequence                       | MH+        | Diff(MH+) | Charge         | Rank         | XC       | DeltaCn |
| 7503_Test,1570                                                                                               | K.GTVVKEETR.R                  | 1019.1343  | 0.1823    | 2              | 1            | 2.4614   | 0.353   |
| 7503_Test,1576                                                                                               | K.GTVVKEETR.R                  | 1019.1343  | 0.1303    | 2              | 1            | 2.8472   | 0.389   |
| 7503_Test,1588                                                                                               | K.GTVVKEETR.R                  | 1019.1343  | 0.5963    | 2              | 1            | 2.7144   | 0.4287  |
| 7503_Test,1860                                                                                               | K.GTVVKEETR.R                  | 1019.1343  | 0.1753    | 2              | 1            | 2.9238   | 0.3669  |
| 7503_Test,1872                                                                                               | K.GTVVKEETR.R                  | 1019.1343  | 0.1403    | 2              | 1            | 2.7705   | 0.423   |
| 7503_Test,1878                                                                                               | K.GTVVKEETR.R                  | 1019.1343  | 0.1893    | 2              | 1            | 2.7504   | 0.3201  |
| 7503_Test,3081                                                                                               | K.VLSPQGDPWDSVAR.I             | 1527.66322 | -0.80178  | 2              | 1            | 4.065    | 0.6215  |
| 7503_Test,3087                                                                                               | K.VLSPQGDPWDSVAR.I             | 1527.66322 | 0.95522   | 2              | 1            | 3.9653   | 0.6064  |
| 7503_Test,3093                                                                                               | K.VLSPQGDPWDSVAR.I             | 1527.66322 | 0.24722   | 2              | 1            | 4.0732   | 0.6465  |
| 7503_Test,3369                                                                                               | K.VLSPQGDPWDSVAR.I             | 1527.66322 | 0.99522   | 2              | 1            | 3.5767   | 0.597   |
| 7503_Test,3375                                                                                               | K.VLSPQGDPWDSVAR.I             | 1527.66322 | 0.72622   | 2              | 1            | 3.5194   | 0.5976  |
| 7503_Test,3381                                                                                               | K.VLSPQGDPWDSVAR.I             | 1527.66322 | 0.41922   | 2              | 1            | 3.7652   | 0.6401  |
| 7503_Test,3186                                                                                               | R.IGEPLMLSCK.G                 | 1148.39198 | 1.34298   | 2              | 1            | 2.3798   | 0.2311  |
| 7503_Test,3207                                                                                               | R.IGEPLMLSCK.G                 | 1148.39198 | -1.67902  | 2              | 1            | 3.6089   | 0.3363  |
| 7503_Test,3214                                                                                               | R.IGEPLMLSCK.G                 | 1148.39198 | -1.85002  | 2              | 1            | 3.4448   | 0.329   |
| 7503_Test,2490                                                                                               | R.RPLNTAPIQPR.V                | 1263.47427 | 0.44327   | 2              | 1            | 2.6695   | 0.4368  |
| 7503_Test,2502                                                                                               | R.RPLNTAPIQPR.V                | 1263.47427 | 0.28727   | 2              | 1            | 2.631    | 0.4262  |
| 7503_Test,3936                                                                                               | R.SELTVTPAQGGTTPTYSCSFSLGLPR.R | 2728.9858  | 0.3088    | 3              | 1            | 4.0758   | 0.546   |
| 7503_Test,3943                                                                                               | R.SELTVTPAQGGTTPTYSCSFSLGLPR.R | 2728.9858  | -0.0362   | 2              | 1            | 4.3011   | 0.611   |
| 7503_Test,3945                                                                                               | R.SELTVTPAQGGTTPTYSCSFSLGLPR.R | 2728.9858  | -0.4462   | 3              | 1            | 4.0494   | 0.5186  |
| 7503_Test,3946                                                                                               | R.SELTVTPAQGGTTPTYSCSFSLGLPR.R | 2728.9858  | 0.2578    | 2              | 1            | 4.5026   | 0.6591  |
| 7503_Test,3951                                                                                               | R.SELTVTPAQGGTTPTYSCSFSLGLPR.R | 2728.9858  | 1.4088    | 2              | 1            | 4.1054   | 0.6156  |
| 7503_Test,3676                                                                                               | R.VYQIPGKPEIVNPASELTANVPNK.V   | 2579.93287 | -0.88213  | 3              | 1            | 5.1792   | 0.5532  |
| 7503_Test,3681                                                                                               | R.VYQIPGKPEIVNPASELTANVPNK.V   | 2579.93287 | 1.05187   | 3              | 1            | 4.902    | 0.5076  |
| 7503_Test,3707                                                                                               | R.VYQIPGKPEIVNPASELTANVPNK.V   | 2579.93287 | 0.01887   | 2              | 1            | 4.7057   | 0.6362  |

**Supplemental Table 3 (b). Peptide sequences matched to RAGE (residues 1–342 correspond to the extracellular domain\*) are shown below.**

| <u>10</u>  | <u>20</u>  | <u>30</u>  | <u>40</u>  | <u>50</u>  | <u>60</u>  | <u>70</u>  | <u>80</u>  | <u>90</u>  | <u>100</u>  |
|------------|------------|------------|------------|------------|------------|------------|------------|------------|-------------|
| MPTGTVARAW | VLVLALWGAV | AGGQNITARI | GEPLMLSCKG | APKKPTQKLE | WKLNTGRTEA | WKVLSPQGDP | WDSVARILPN | GSLLLPAIGI | VDEGTFR CRA |
| <u>110</u> | <u>120</u> | <u>130</u> | <u>140</u> | <u>150</u> | <u>160</u> | <u>170</u> | <u>180</u> | <u>190</u> | <u>200</u>  |
| TNRLGKEVKS | NYRVRVYQIP | GKPEIVNPAS | ELTANVPNKV | GTCVSEGSYP | AGTLSWHLDG | KPLIPDGKGT | VVKEETRRHP | ETGLFTLRSE | LTVTPAQGGT  |
| <u>210</u> | <u>220</u> | <u>230</u> | <u>240</u> | <u>250</u> | <u>260</u> | <u>270</u> | <u>280</u> | <u>290</u> | <u>300</u>  |
| TPTYSCSFSL | GLPRRRPLNT | APIQPRVREP | LPPEGIQLLV | EPEGGTVAPG | GTVTLTCAIS | AQPPPQIHWI | KDGTPLPLAP | SPVLLLPEVG | HEDEGIYSCV  |
| <u>310</u> | <u>320</u> | <u>330</u> | <u>340</u> | <u>350</u> | <u>360</u> | <u>370</u> | <u>380</u> | <u>390</u> | <u>400</u>  |
| ATHPSHGPQE | SPPVNIRVTE | TGDEGQAAGS | VDGSGLGTLA | LALGILGGLG | IAALLIGAIL | WRKRQPRLEE | RKAPESQEDE | EERAELNQSE | EAEMPENGAG  |

402

GP

\*Reference: Renard, C.; Chappey, O.; Wautier, M. P.; Nagashima, M.; Morser, J.; Scherrmann, J. M.; Wautier, J. L., The human and rat recombinant receptors for advanced glycation end products have a high degree of homology but different pharmacokinetic properties in rats. *J Pharmacol Exp Ther* **1999**, 290, (3), 1458-66.
